# Supplementary material
Source: PubMed Central journal article supplement (PMC3910789)
Supplement: AAC.01684-13_zac001142477so1.pdf [file AAC.01684-13_zac001142477so1.pdf]

1 **Supplemental material**

2

3 **Table S1-** Oligonucleotides used in this study

| Target gene                   | Reaction         | Oligonucleotide                                                                               | Sequence (5'-3')                                                                           | Amplimer (bp) | Ref.       |
|-------------------------------|------------------|-----------------------------------------------------------------------------------------------|--------------------------------------------------------------------------------------------|---------------|------------|
| <i>bla</i> <sub>TEM</sub>     | TEM PCR          | UP<br>LP                                                                                      | CTCACCCAGAAACGCTGGTG<br>ATCCGCCTCCATCCAGTCTA                                               | 569           | 1          |
|                               | TEM qPCR         | UP<br>LP<br>TaqMan TEM Probe                                                                  | CACTATTCTCAGAATGACTTGGT<br>TGCATAATTCTCTTACTGTCATG<br>FAM-CCAGTCACAGAAAAGCATCTTACGG-MGBNFQ | 85            | 2          |
| <i>bla</i> <sub>CTX-M-1</sub> | CTX-M-1 PCR      | UP<br>LP                                                                                      | ACGTTAAACACCGCCATTCC<br>TCGGTGACGATTTTAGCCCGC                                              | 356           | 1          |
|                               | CTX-M-1 qPCR     | UP CTX-M<br>LP CTX-M<br>TaqMan CTX-M Probe                                                    | ACCAACGATATCGCGGTGAT<br>ACATCGCGACGGCTTTCT<br>FAM-TCGTGCGCCGCTG- MGBNFQ                    | 101           | 1          |
| <i>mecA</i>                   | <i>mecA</i> PCR  | UP<br>LP                                                                                      | ATACTTAGTTCTTTAGCGAT<br>GATAGCAGTTATATTTCTA                                                | 434           | 1          |
|                               | <i>mecA</i> qPCR | UP<br>LP                                                                                      | CGCAACGTTCAATTTAATTTTGTTAA<br>TGGTCTTTCTGCATTCTGGA                                         | 92            | 3          |
| <i>qnrA</i>                   | <i>qnrA</i> PCR  | TaqMan <i>mecA</i> 1FAM probe<br>UP<br>LP                                                     | FAM-AATGACGCTATGATCCCAATCTAACTTCCACA-TAMRA<br>ACGCCAGGATTTGAGTGAC<br>CCAGGCACAGATCTTGAC    | 565           | 4          |
|                               | <i>qnrA</i> qPCR | UP <sub><i>qnrA</i></sub><br>LP <sub><i>qnrA</i></sub><br>TaqMan <sub><i>qnrA</i></sub> probe | AGGATTGCAGTTTCATTGAAAGC<br>TGAACTCTATGCCAAAGCAGTTG<br>FAM-TATGCCGATCTGCGCGA- MGBNFQ        | 138           | This study |
| <i>qnrS</i>                   | <i>qnrS</i> PCR  | UP<br>LP                                                                                      | TTAAGTCTGACTCTTTTCAGTGATG<br>CAAGCGGTGAAGGTGAGATCACTT                                      | 425           | This study |
|                               | <i>qnrS</i> qPCR | UP <sub><i>qnrS</i></sub><br>LP <sub><i>qnrS</i></sub><br>TaqMan <sub><i>qnrS</i></sub> probe | CGACGTGCTAACTTGCCTGA<br>GGCATTGTTGGAAACTTGCA<br>FAM-AGTTCATTGAACAGGGTGA-MGBNFQ             | 118           | This study |
| <i>armA</i>                   | <i>armA</i> qPCR | UP <sub><i>armA</i></sub><br>LP <sub><i>armA</i></sub><br>TaqMan <sub><i>armA</i></sub> probe | GAAAGAGTCGCAACATTAATGACTT<br>GATTGAAGCCACAACCAAATCT<br>FAM-TCAAACATGTCTCATCTATT-MGBNFQ     | 93            | This study |
| pGEM                          | PCR              | pGEM7up                                                                                       | TGTAATACGACTCACTAT                                                                         |               | Promega    |
| 16S rDNA                      | PCR              | UP                                                                                            | AAGAGTTTGATCCTGGCTCAG                                                                      | 1503          | 5          |
| Eubacteria                    |                  | LP                                                                                            | TACGGCTACCTTGTTACGACTT                                                                     |               |            |

4 PCR: conventional PCR. qPCR: quantitative real time PCR. UP:upper primer, LP: lower primer

### Supplementary references

1. **Colomer-Lluch M, Jofre J, Muniesa M.** 2011. Antibiotic resistance genes in the bacteriophage DNA fraction of environmental samples. *PLoS One.* **6**:e17549.
2. **Lachmayr KL, Kerkhof LJ, Dirienzo AG, Cavanaugh CM, Ford TE.** 2009. Quantifying nonspecific TEM beta-lactamase *bla*<sub>TEM</sub> genes in a wastewater stream. *Appl. Environ. Microbiol.* **75**:203-211.
3. **Volkman H, Schwartz T, Bischoff P, Kirchen S, Obst U.** 2004. Detection of clinically relevant antibiotic-resistance genes in municipal wastewater using real-time PCR TaqMan. *J. Microbiol. Meth.* **56**:277-286.
4. **Lavilla S, González-López JJ, Sabaté M, García-Fernández A, Larrosa MN, Bartolomé RM, Carattoli A, Prats G.** 2008. Prevalence of *qnr* genes among extended-spectrum beta-lactamase-producing enterobacterial isolates in Barcelona, Spain. *J. Antimicrob. Chemother.* **61**: 291-295.
5. **Sander M, Schmieger H.** 2001. Method for host-independent detection of generalized transducing bacteriophages in natural habitats. *Appl. Environ. Microbiol.* **67**:1490-1493.
